# Supplementary material for: Predictors of Neurodevelopment in Microcephaly Associated with Congenital Zika Syndrome: A Prospective Study
Source: MDPI journal article supplement (doi:10.3390/children10121831), 2023-11-21
Supplement: s1 [file s1]

## Supplementary tables:

**Table S1.** Variables associated with developmental delay in cognitive domain in infants with microcephaly

| Variables                  | Unadjusted effects | IC 95%           | p            | Adjusted effects | IC 95%              | p            |
|----------------------------|--------------------|------------------|--------------|------------------|---------------------|--------------|
| Mother age (years)         | 0.168              | (-0.36 – 0.70)   | 0.53         |                  |                     |              |
| Maternal symptoms          | -7.03              | (-16.35 – 2.29)  | 0.14         |                  |                     |              |
| Gestacional age (weeks)    | -0.80              | (-2.14 – 0.55)   | 0.24         |                  |                     |              |
| Birth weight (g)           | 0.0                | (-0.006 – 0.007) | 0.91         |                  |                     |              |
| Length at birth (cm)       | -0.23              | (-1.18 – 0.72)   | 0.62         |                  |                     |              |
| HC at birth (cm)           | -0.24              | (-1.7 – 1.22)    | 0.74         |                  |                     |              |
| zHC at birth               | 0.94               | (-1.24 – 3.11)   | 0.39         | 1.48             | (-0.7 – 3.7)        | 0.186        |
| Apgar 1'                   | 0.27               | (-2.01 – 2.56)   | 0.81         |                  |                     |              |
| Apgar 5'                   | -4.15              | (-10.87 – 2.58)  | 0.22         |                  |                     |              |
| Female Sex                 | 2.64               | (-3.77 – 9.05)   | 0.41         |                  |                     |              |
| Arthrogryposis             | 1.02               | (-8.54 – 10.57)  | 0.83         |                  |                     |              |
| Low vision                 | 0.45               | (-6.15 – 7.04)   | 0.89         |                  |                     |              |
| Neonatal seizure           | 5.87               | (-1.72 – 13.47)  | 0.13         |                  |                     |              |
| Neonatal jaundice          | 4.32               | (-5.94 – 14.58)  | 0.40         |                  |                     |              |
| Neonatal dysphagia         | 0.67               | (-8.89 – 9.03)   | 0.99         |                  |                     |              |
| Ventriculomegaly           | -1.21              | (-9.32 – 6.89)   | 0.76         |                  |                     |              |
| Colpocephaly               | 5.24               | (6.07 – 16.56)   | 0.36         |                  |                     |              |
| Corpus callosum dysgenesis | 3.32               | (-3.14 – 9.78)   | 0.31         |                  |                     |              |
| Cerebellar hypoplasia      | 7.47               | (-3.72 – 18.7)   | 0.19         |                  |                     |              |
| Evans' Index*              | 2.802              | (0.1156 – 5.443) | <b>0.038</b> | <b>3.42</b>      | <b>(6.6 – 61.8)</b> | <b>0.016</b> |

\*per 0.1 increase in Evans' Index.

**Table S2.** Variable associated with developmental delay in receptive language domain in infants with microcephaly related to congenital Zika syndrome.

| <b>Variables</b>           | <b>Unadjusted effects</b> | <b>IC 95%</b>     | <b>p</b>     | <b>Adjusted effects</b> | <b>IC 95%</b>        | <b>p</b>     |
|----------------------------|---------------------------|-------------------|--------------|-------------------------|----------------------|--------------|
| Mother age (years)         | 0.19                      | (-0.31 – 0.68)    | 0.46         |                         |                      |              |
| Maternal symptoms          | -6.34                     | (-15.09 – 2.41)   | 0.15         |                         |                      |              |
| Gestacional age (weeks)    | -0.86                     | (-2.109 – 0.394)  | 0.174        |                         |                      |              |
| Birth Weight (g)           | 0.001                     | (-0.005 – 0.007)  | 0.820        |                         |                      |              |
| Length at birth (cm)       | 0.14                      | (-0.75 – 1.03)    | 0.751        |                         |                      |              |
| HC at birth (cm)           | -0.98                     | (-1.47 – 1.28)    | 0.886        |                         |                      |              |
| zHC at birth               | 1.18                      | (-0.85 – 3.20)    | 0.248        | 1.701                   | (-0.38 – 3.78)       | 0.106        |
| Apgar 1'                   | 0.52                      | (-1.61 – 2.66)    | 0.624        |                         |                      |              |
| Apgar 5'                   | -4.49                     | (-10.75 – 1.77)   | 0.155        |                         |                      |              |
| Female Sex                 | 2.52                      | (-3.49 – 8.53)    | 0.402        |                         |                      |              |
| Arthrogryposis             | 0.22                      | (-8.74 – 9.18)    | 0.960        |                         |                      |              |
| Low vision                 | 0.58                      | (-6.76 – 5.60)    | 0.851        |                         |                      |              |
| Neonatal seizure           | 4.49                      | (-2.70 – 11.67)   | 0.215        |                         |                      |              |
| Neonatal jaundice          | 4.94                      | (-4.64 – 14.52)   | 0.305        |                         |                      |              |
| Neonatal dysphagia         | 0.15                      | (-8.55 – 8.25)    | 0.972        |                         |                      |              |
| Ventriculomegaly           | 1.49                      | (-9.09 – 6.09)    | 0.693        |                         |                      |              |
| Colpocephaly               | 3.545                     | (-7.112 – 14.201) | 0.506        |                         |                      |              |
| Corpus callosum dysgenesis | 2.73                      | (-3.34 – 8.905)   | 0.37         |                         |                      |              |
| Cerebellar hypoplasia      | 5.954                     | (-4.60 – -16.51)  | 0.262        |                         |                      |              |
| Evans' Index*              | 2.5264                    | (0.029 – 5.023)   | <b>0.047</b> | <b>3.2142</b>           | <b>(6.38 – 57.9)</b> | <b>0.016</b> |

\*per 0.1 increase in Evans' Index.

**Table S3.** Variables associated with developmental delay in expressive language domain in infants with microcephaly related to congenital Zika syndrome.

| <b>Variables</b>           | <b>Unadjusted effects</b> | <b>IC 95%</b>     | <b>p</b> | <b>Adjusted effects</b> | <b>IC 95%</b>       | <b>p</b>     |
|----------------------------|---------------------------|-------------------|----------|-------------------------|---------------------|--------------|
| Mother age (years)         | 0.12                      | (-0.41 – 0.642)   | 0.66     |                         |                     |              |
| Maternal symptoms          | -7.96                     | (-17.053 – 1.112) | 0.09     |                         |                     |              |
| Gestacional age (weeks)    | -0.88                     | (-2.20 – 0.423)   | 0.18     |                         |                     |              |
| Birth weight (g)           | 0.001                     | (-0.005 – 0.007)  | 0.76     |                         |                     |              |
| Length at birth (cm)       | -0.18                     | (-1.11 – 0.750)   | 0.69     |                         |                     |              |
| HC at birth (cm)           | 0.48                      | (-1.39 – 1.49)    | 0.95     |                         |                     |              |
| zHC at birth               | 1.44                      | (-0.676 – 3.555)  | 0.18     | 1.95                    | (-0.203 – 4.12)     | 0.074        |
| Apgar 1'                   | 0.10                      | (-2.15 – 2.35)    | 0.93     |                         |                     |              |
| Apgar 5'                   | -4.30                     | (-10.91 – 2.31)   | 0.196    |                         |                     |              |
| Female Sex                 | 2.12                      | (-4.2 – 8.44)     | 0.50     |                         |                     |              |
| Arthrogryposis             | 0.23                      | (-9.105 – 9.701)  | 0.95     |                         |                     |              |
| Low vision                 | 0.89                      | (-5.597 – 7.370)  | 0.784    |                         |                     |              |
| Neonatal seizure           | 4.25                      | (-3.31 – 11.83)   | 0.26     |                         |                     |              |
| Neonatal jaundice          | 4.95                      | (-5.11 – 15.01)   | 0.33     |                         |                     |              |
| Neonatal dysphagia         | 0.38                      | (-8.43 – 9.20)    | 0.93     |                         |                     |              |
| Ventriculomegaly           | -2.13                     | (-10.09 – 5.82)   | 0.53     |                         |                     |              |
| Colpocephaly               | 3.93                      | (-7.24 – 15.11)   | 0.48     |                         |                     |              |
| Corpus callosum dysgenesis | 2.90                      | (-3.46 – 9.27)    | 0.36     |                         |                     |              |
| Cerebellar hypoplasia      | 6.56                      | (-4.498 – 17.62)  | 0.238    |                         |                     |              |
| Evans' Index*              | 2.29                      | (-0.13 – 4.89)    | 0.083    | <b>3.42</b>             | <b>(6.6 – 61.8)</b> | <b>0.016</b> |

\*per 0.1 increase in Evans' Index.

**Table S4.** Variables associated with developmental delay in gross motor domain in infants with microcephaly related to congenital Zika syndrome.

| <b>Variables</b>           | <b>Unadjusted effects</b> | <b>IC 95%</b>     | <b>p</b> | <b>Adjusted effects</b> | <b>IC 95%</b>   | <b>p</b> |
|----------------------------|---------------------------|-------------------|----------|-------------------------|-----------------|----------|
| Mother age (years)         | 0.239                     | (-0.166 – 0.644)  | 0.240    |                         |                 |          |
| Maternal symptoms          | -5.779                    | (-12.964 – 1.406) | 0.112    |                         |                 |          |
| Gestacional age (weeks)    | -0.45                     | (-1.496 – 0.597)  | 0.391    |                         |                 |          |
| Birth weight (g)           | 0.001                     | (-0.004 – 0.006)  | 0.623    |                         |                 |          |
| Length at birth (cm)       | -0.039                    | (-0.774 – 0.695)  | 0.914    |                         |                 |          |
| HC at birth (cm)           | 0.103                     | (-1.032 – 1.23)   | 0.856    |                         |                 |          |
| zHC at birth               | 0.930                     | (-0.745 – 2.606)  | 0.269    | 1.44                    | (-0.225 – 3.12) | 0.088    |
| Apgar 1'                   | 0.594                     | (-1.16 – 2.34)    | 0.498    |                         |                 |          |
| Apgar 5'                   | -2.70                     | (-7.92 – 2.51)    | 0.302    |                         |                 |          |
| Female Sex                 | 0.23                      | (-4.77 – 5.23)    | 0.927    |                         |                 |          |
| Arthrogryposis             | -0.167                    | (-7.56 – 7.23)    | 0.964    |                         |                 |          |
| Low vision                 | 0.34                      | (-4.76 – 5.44)    | 0.890    |                         |                 |          |
| Neonatal seizure           | 4.681                     | (-1.18 – 10.55)   | 0.115    |                         |                 |          |
| Neonatal jaundice          | 3.24                      | (-4.69 – 11.19)   | 0.410    |                         |                 |          |
| Neonatal dysphagia         | 0.515                     | (-7.44 – 6.41)    | 0.880    |                         |                 |          |
| Ventriculomegaly           | -0.602                    | (-6.87 – 5.67)    | 0.840    |                         |                 |          |
| Colpocephaly               | 5.186                     | (-3.51 – 13.88)   | 0.236    |                         |                 |          |
| Corpus callosum dysgenesis | 1.59                      | (-3.43 – 6.63)    | 0.520    |                         |                 |          |
| Cerebellar hypoplasia      | 6.88                      | (-1.70 – 15.47)   | 0.113    |                         |                 |          |
| Evans' Index*              | 1.883                     | (-0.1175 – 3.884) | 0.064    | 2.372                   | (3.01 – 44.4)   | 0.026    |

\*per 0.1 increase in Evans' Index.

**Table S5.** Variables associated with developmental delay in fine motor in infants with microcephaly related to congenital Zika syndrome.

| <b>Variables</b>           | <b>Unadjusted effects</b> | <b>IC 95%</b>      | <b>p</b> | <b>Adjusted effects</b> | <b>IC95%</b>         | <b>p</b>     |
|----------------------------|---------------------------|--------------------|----------|-------------------------|----------------------|--------------|
| Mother age (years)         | 0.168                     | (-0.345 – 0.681)   | 0.513    |                         |                      |              |
| Maternal symptoms          | -6.183                    | (-15.20 – 2.835)   | 0.174    |                         |                      |              |
| Gestacional age (weeks)    | -0.79                     | (-2.09 – 0.493)    | 0.219    |                         |                      |              |
| Birth weight (g)           | 0.001                     | (-0.006 – 0.007)   | 0.852    |                         |                      |              |
| Length at birth (cm)       | -0.151                    | (-1.064 – 0.762)   | 0.740    |                         |                      |              |
| HC at birth (cm)           | -0.187                    | (-1.59 – 1.22)     | 0.791    |                         |                      |              |
| zHC at birth               | 0.973                     | (-1.122 – 3.068)   | 0.354    | 1.478                   | (-0.65 – 3.61)       | 0.169        |
| Apgar 1'                   | 0.16                      | (-2.04 – 2.36)     | 0.883    |                         |                      |              |
| Apgar 5'                   | 4.38                      | (-10.85 – 2.078)   | 0.178    |                         |                      |              |
| Female Sex                 | 2.28                      | (-3.90 – 8.47)     | 0.461    |                         |                      |              |
| Arthrogryposis             | 0.965                     | (-8.24 – 10.17)    | 0.834    |                         |                      |              |
| Low vision                 | 1.611                     | (-4.72 – 7.94)     | 0.611    |                         |                      |              |
| Neonatal seizure           | 5.818                     | (-1.49 – 13.128)   | 0.116    |                         |                      |              |
| Neonatal jaundice          | 3.78                      | (-6.11 – 13.68)    | 0.445    |                         |                      |              |
| Neonatal dysphagia         | 0.026                     | (-8.66 – 8.61)     | 0.995    |                         |                      |              |
| Ventriculomegaly           | -1.045                    | (-8.8 – 6.76)      | 0.789    |                         |                      |              |
| Colpocephaly               | 5.804                     | (-5.063 – 16.671 ) | 0.288    |                         |                      |              |
| Corpus callosum dysgenesis | 3.185                     | (-3.03 – 9.411)    | 0.308    |                         |                      |              |
| Cerebellar hypoplasia      | 7.42                      | (-3.35 – 18.201)   | 0.172    |                         |                      |              |
| Evans' Index*              | 2.549                     | (0.022 – 5.077)    | 0.048    | <b>3.14</b>             | <b>(5.04 – 57.8)</b> | <b>0.021</b> |

\*per 0.1 increase in Evans' Index.
